# Supplementary material for: Converting 3D rigid metal–organic frameworks (MOFs) to 2D flexible networks via ligand exchange for enhanced CO2/N2 and CH4/N2 separation
Source: Royal Society of Chemistry journal article supplement (doi:10.1039/c5cc05867h), 2015-01-01
Supplement: c5cc05867h1.pdf [file c5cc05867h1.pdf]

## Supporting Information for

# Converting 3D Rigid Metal-Organic Frameworks (MOFs) to 2D Flexible Networks via Ligand Exchange for Enhanced CO<sub>2</sub>/N<sub>2</sub> and CH<sub>4</sub>/N<sub>2</sub> Separation

Yingdian He,<sup>a</sup> Jin Shang,<sup>\*ab</sup> Qinfen Gu,<sup>c</sup> Gang Li,<sup>d</sup> Jiaye Li,<sup>e</sup> Ranjeet Singh,<sup>a</sup> Penny Xiao,<sup>ab</sup> and Paul A. Webley<sup>\*ab</sup>

<sup>a</sup>Department of Chemical and Biomolecular Engineering, The University of Melbourne, Victoria 3010, Australia. E-mail: paul.webley@unimelb.edu.au

<sup>b</sup>Cooperative Research Center for Greenhouse Gas Technologies (CO2CRC), Melbourne, Australia.

<sup>c</sup>Australian Synchrotron, 800 Blackburn Rd, Clayton, Victoria 3168, Australia.

<sup>d</sup>Australian Centre for Energy, School of Mechanical and Chemical Engineering, The University of Western Australia, Crawley, WA 6009, Australia

<sup>e</sup>School of Chemistry, Monash University, Victoria 3800, Australia.

## 1. General Information

Chemicals: All reagents were purchased from commercial sources (Sigma Aldrich and Merck) and were used without further purification. Specifically, Zinc acetate dehydrate Zn(CH<sub>3</sub>COO)<sub>2</sub> · 2H<sub>2</sub>O, 4,4'-biphenyldicarboxylic acid (BPDC), 4,4'-Dipyridyl (BiPY) (98%), 1,3-Bis(4-pyridyl)propane (BPP) (98%), Dimethyl sulfoxide-d<sub>6</sub> (DMSO- d<sub>6</sub>) (99.9 atom %D), Sulfuric acid-d<sub>2</sub> solution (D<sub>2</sub>SO<sub>4</sub>/D<sub>2</sub>O) (96-98 wt. % in D<sub>2</sub>O) were purchased from Sigma-Aldrich. Glacial Acetic acid AR(CH<sub>3</sub>COOH) (100%), and Ethanol (C<sub>2</sub>H<sub>5</sub>OH) (100%) were purchased from chem-supply. N,N-dimethylformamide (DMF) (99.9%) was purchased from PROLABO CHEMICALS.

## 2. Materials synthesis

Parent material **1**: A mixture of Zinc (II) acetate dehydrate (1 mmol, 0.2195 g), 4'-biphenyldicarboxylic acid (1 mmol, 0.242 g) and 4,4'-Dipyridyl (0.5 mmol, 0.0788 g) in 20 mL DMF was stirring for 3 hours and then transferred to a 40ml Teflon-lined stainless steel autoclave. The autoclave was transferred to pre-heated oven at 120 °C for 72 hours before it was cooled down slowly. The colourless crystals of **1** were filtered and washed with DMF (15 ml) three times and dried in a vacuum oven for 2 hours (86% yield based on zinc acetate).

Daughter material **2**: Based on the single crystal of **1** as precursor, the daughter material **2** was synthesized by Solvent-Assisted Ligands Exchange (SALE). To be specific, a concentrated 1,3-Bis(4-pyridyl)propane (BPP) solution was prepared: 1 mmol (0.1983 g) BPP was dissolved in 8 ml DMF by ultrasound for 5 minutes, then 2 ml Ethanol and 200 µl acetic acid were added. Approximately 200 mg of parent crystals of **1** were soaked in the BPP solution

and transferred to a 20 ml Teflon lined autoclave. The reaction was undertaken at 105 °C, and every 3 days, the product was washed thoroughly with hot DMF (3\*20ml) and the BPP solution was refreshed. The above procedure was repeated 4 times (12 days reaction time in total). Elemental analysis calcd(%)for desolvated **2** Zn(BPDC)(BPP), (ZnC<sub>27</sub>O<sub>4</sub>N<sub>2</sub>H<sub>22</sub>) C 64.41, H 4.37, N 5.56; found: 62.60, H 4.38, N 5.23.

### 3. Characterization measurements

**NMR:** <sup>1</sup>H NMR experiment were conducted on a Bruker AvanceIII 400 spectrometer, operating at 400 MHz. The samples for <sup>1</sup>H spectral measurements were prepared by the following procedure: around 5 mg of a sample was washed thoroughly by DMF and dried at 60 °C in a vacuum oven. The sample was digested by 10 min sonication in deuterated dimethyl sulfoxide (DMSO) solution mixed with 3 drops of D<sub>2</sub>SO<sub>4</sub>. The digestion solution was used directly for <sup>1</sup>H-NMR.

**SEM:** The morphology of the products was investigated on a JEOL 7001F FEG scanning electron microscope (SEM), operating at 15 kV. The sample was crushed and sprinkled on carbon tape mounted on a metal stub and coated with a 1 nm layer of platinum metal.

**TGA:** Thermogravimetric (TG) analyses were conducted using a Mettler Toledo TGA-SDTA851 analyser (Switzerland) from 30 to 800 °C with ramping rate of 2 °C/min, under nitrogen (40 mL/min) to investigate thermal stability and composition of the sample **1** and **2**.

**CHN elemental analysis:** The determination of carbon, hydrogen, and nitrogen (%CHN analysis) for the sample **2** was conducted by Carlo Erba Flash 2000 Elemental Analyser at the London Metropolitan University.

**Synchrotron Powder X-ray Diffraction:** High-resolution synchrotron powder X-ray diffraction (PXRD) data was collected on both parent and daughter samples by a Mythen-II detector on powder diffraction beamline, Australian synchrotron. The wavelength was calibrated by NIST LaB<sub>6</sub> 660b standard of 0.7742 Å. For phase identification and structure determination, the synthesized samples were dried at 60 °C in vacuum oven and directly loaded into 0.7 mm glass capillaries sealed with wax for PXRD measurements. An Oxford cryostream instrument was used to control the sample temperature in the range of 100K – 500K.

**In situ Synchrotron Powder X-ray Diffraction depending on CO<sub>2</sub> pressure:** The samples were activated at 120 °C under high vacuum over night before being loaded in 0.01mm wall

thickness capillaries purchased from Hilgenberg. The sample containing capillary was fitted with an in-house designed flow cell connected to CO<sub>2</sub> gas line and vacuum by selective valves. CO<sub>2</sub> was introduced to each pressure point. Equilibrium was assumed by exposing the sample for 30 mins.

#### **The single crystal XRD:**

A suitable crystal of **1** was taken directly from the mixture and coated in protective oil. The crystal was held at 130 K for the data collection. The X-ray data on a crystal of solvated **1** were collected using an Oxford Xcalibur diffractometer fitted with a CuK $\alpha$  X-ray source. The crystal parameters of material **1** based on single XRD data are provided in Table S1.

Single crystal data of daughter sample **2** was also collected by the above procedures but the data quality is too poor for a single-crystal structural determination.

**Table S1: Structure information of 1 and 2:**

| Sample name | Space group                           | <i>a</i> (Å) | <i>b</i> (Å) | <i>c</i> (Å) | $\alpha$ (deg) | $\beta$ (deg) | $\gamma$ (deg) |
|-------------|---------------------------------------|--------------|--------------|--------------|----------------|---------------|----------------|
| <b>1</b>    | Orthorhombic<br><i>Pbcn</i>           | 25.052       | 18.160       | 14.511       | 90             | 90            | 90             |
| <b>2</b>    | Monoclinic<br><i>P2<sub>1</sub>/c</i> | 29.3482      | 11.7160      | 15.7311      | 90.000         | 90.126        | 90.000         |

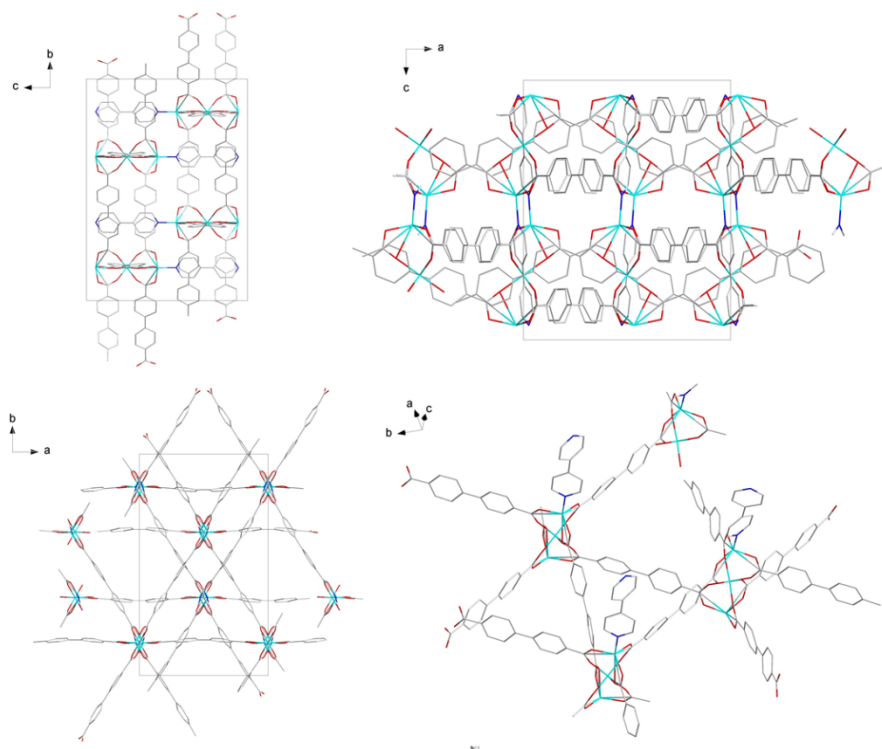

Fig. S1 Crystal structure of parent sample **1**.<sup>1</sup>

**Structure determination of daughter material 2:** The PXRD pattern can be indexed with a monoclinic unit cell using DICVOL06.<sup>2</sup> The structure solution was started using the charge-flipping algorithm implemented in the program TOPAS v4.2.<sup>3</sup> Two Zn atoms were easily located in the electron density maps. However, it was difficult to locate the BPDC and BPP molecules directly. The structure was subsequently solved in the space group of  $P2_1/c$  (No. 14) by global optimization in direct space with 8 BPDC and 8 BPP molecules with combined PXRD and single crystal data (trimmed above 2.25 Å) using the program FOX<sup>4</sup>. During the structure determination, the BPDC and BPP molecules were constructed as rigid bodies with relaxed restraints. Rietveld refinement was performed using TOPAS v4.2, and the refined lattice parameters are  $a = 11.7126(1)$  Å,  $b = 15.7432(1)$  Å,  $c = 29.3424(1)$  Å,  $V = 5410.54(1)$  Å<sup>3</sup>. The diffraction profile fit by Rietveld refinement using these parameters is shown in Fig. S1, with the agreement factors of  $R_{wp} = 8.2\%$ ,  $R_B = 6.5\%$ , and  $GoF = 1.84$ . The details of the structure determination and crystallographic data are presented in Table S2.

Table S2: Experimental and crystallographic data of Zn<sub>8</sub>(BPDC)<sub>8</sub>(BPP)<sub>8</sub>.

| Phase data        |                                                                  |        |          |          |         |  |
|-------------------|------------------------------------------------------------------|--------|----------|----------|---------|--|
| Formula sum       | Zn <sub>8</sub> C <sub>216</sub> O <sub>32</sub> N <sub>16</sub> |        |          |          |         |  |
| Formula weight    | 3853.58 g/mol                                                    |        |          |          |         |  |
| Crystal system    | monoclinic                                                       |        |          |          |         |  |
| Space-group       | P 1 2 <sub>1</sub> /c 1 (14)                                     |        |          |          |         |  |
| Cell parameters   | a=11.7126(1) Å b=15.7432(1) Å c=29.3424(1) Å β=90.126(1)°        |        |          |          |         |  |
| Cell ratio        | a/b=0.7440 b/c=0.5365 c/a=2.5052                                 |        |          |          |         |  |
| Cell volume       | 5410.54(1) Å <sup>3</sup>                                        |        |          |          |         |  |
| Z                 | 4                                                                |        |          |          |         |  |
| Tempure           | 100K                                                             |        |          |          |         |  |
| Calc. density     | 1.18263 g/cm <sup>3</sup>                                        |        |          |          |         |  |
| Atomic parameters |                                                                  |        |          |          |         |  |
| Atom              | Wyck.                                                            | S.O.F. | x/a      | y/b      | z/c     |  |
| Zn01              | 4e                                                               | 1      | 0.47450  | 0.63260  | 0.40840 |  |
| C1C               | 4e                                                               | 1      | 0.27490  | 0.11480  | 0.41530 |  |
| Zn02              | 4e                                                               | 1      | 0.02540  | 0.13290  | 0.40850 |  |
| C2C               | 4e                                                               | 1      | 0.18160  | -0.02670 | 0.42180 |  |
| C5C               | 4e                                                               | 1      | 0.39290  | -0.01870 | 0.43180 |  |
| C4C               | 4e                                                               | 1      | 0.37320  | 0.07300  | 0.42250 |  |
| C3C               | 4e                                                               | 1      | 0.29820  | -0.05860 | 0.42900 |  |
| C9C               | 4e                                                               | 1      | 0.75080  | -0.07770 | 0.42130 |  |
| C8C               | 4e                                                               | 1      | 0.67490  | -0.11920 | 0.42300 |  |
| C7C               | 4e                                                               | 1      | 0.58020  | -0.09580 | 0.41920 |  |
| C6C               | 4e                                                               | 1      | 0.50620  | -0.06660 | 0.44280 |  |
| C10C              | 4e                                                               | 1      | 0.77020  | -0.03780 | 0.46320 |  |
| C13C              | 4e                                                               | 1      | 0.86820  | 0.01910  | 0.45690 |  |
| C12C              | 4e                                                               | 1      | 0.86340  | 0.00970  | 0.37280 |  |
| C11C              | 4e                                                               | 1      | 0.77650  | -0.05940 | 0.37780 |  |
| O1A               | 4e                                                               | 1      | -0.02030 | 0.32730  | 0.84750 |  |
| C1A               | 4e                                                               | 1      | 0.06020  | 0.30000  | 0.83020 |  |
| C1B               | 4e                                                               | 1      | 0.43310  | 0.80040  | 0.82970 |  |
| O1B               | 4e                                                               | 1      | 0.34920  | 0.77120  | 0.84830 |  |
| N1D               | 4e                                                               | 1      | 0.60040  | 0.53650  | 0.41350 |  |
| C1D               | 4e                                                               | 1      | 0.63250  | 0.51230  | 0.45520 |  |
| N1C               | 4e                                                               | 1      | 0.17350  | 0.06820  | 0.41510 |  |
| O2A               | 4e                                                               | 1      | 0.15160  | 0.27260  | 0.84760 |  |
| C2A               | 4e                                                               | 1      | 0.04670  | 0.28840  | 0.77740 |  |
| O3A               | 4e                                                               | 1      | -0.00680 | 0.18200  | 0.46630 |  |
| C2D               | 4e                                                               | 1      | 0.65000  | 0.49740  | 0.38000 |  |
| N2D               | 4e                                                               | 1      | 0.32470  | 0.56690  | 0.41600 |  |
| N2C               | 4e                                                               | 1      | 0.90040  | 0.03460  | 0.41420 |  |
| C3A               | 4e                                                               | 1      | -0.03800 | 0.30720  | 0.75320 |  |
| O2B               | 4e                                                               | 1      | 0.52180  | 0.82570  | 0.84680 |  |
| C2B               | 4e                                                               | 1      | 0.45350  | 0.78860  | 0.77710 |  |
| O4A               | 4e                                                               | 1      | 0.15900  | 0.24830  | 0.46530 |  |
| C3D               | 4e                                                               | 1      | 0.73460  | 0.42970  | 0.38250 |  |
| C4A               | 4e                                                               | 1      | 0.14450  | 0.26320  | 0.75660 |  |
| O4B               | 4e                                                               | 1      | 0.50540  | 0.68090  | 0.46520 |  |
| C4B               | 4e                                                               | 1      | 0.53470  | 0.81000  | 0.75190 |  |
| C5A               | 4e                                                               | 1      | -0.05240 | 0.29980  | 0.70470 |  |
| C4D               | 4e                                                               | 1      | 0.72780  | 0.44230  | 0.46370 |  |
| C6A               | 4e                                                               | 1      | 0.13010  | 0.24800  | 0.70170 |  |
| C5D               | 4e                                                               | 1      | 0.76310  | 0.41850  | 0.42370 |  |
| C5B               | 4e                                                               | 1      | 0.36800  | 0.74980  | 0.70390 |  |
| C7A               | 4e                                                               | 1      | 0.03920  | 0.28250  | 0.68310 |  |
| C6D               | 4e                                                               | 1      | 0.86280  | 0.37370  | 0.42110 |  |
| C6B               | 4e                                                               | 1      | 0.55010  | 0.80160  | 0.70530 |  |
| C8A               | 4e                                                               | 1      | 0.05440  | 0.26930  | 0.63190 |  |
| C7D               | 4e                                                               | 1      | 0.96110  | 0.40650  | 0.39950 |  |
| C7B               | 4e                                                               | 1      | 0.46460  | 0.78130  | 0.68320 |  |
| C9A               | 4e                                                               | 1      | -0.03490 | 0.22850  | 0.60480 |  |
| C8D               | 4e                                                               | 1      | 0.99340  | 0.43070  | 0.44800 |  |
| C8B               | 4e                                                               | 1      | 0.45250  | 0.76640  | 0.63150 |  |
| C10A              | 4e                                                               | 1      | 0.15090  | 0.29520  | 0.60580 |  |
| C9D               | 4e                                                               | 1      | 0.11400  | 0.48210  | 0.43000 |  |
| C9B               | 4e                                                               | 1      | 0.35170  | 0.79240  | 0.60410 |  |
| C11A              | 4e                                                               | 1      | -0.03770 | 0.21940  | 0.55650 |  |
| C10D              | 4e                                                               | 1      | 0.12570  | 0.57220  | 0.41870 |  |
| C10B              | 4e                                                               | 1      | 0.53290  | 0.72780  | 0.60400 |  |
| C12A              | 4e                                                               | 1      | 0.16540  | 0.28650  | 0.55970 |  |
| C11D              | 4e                                                               | 1      | 0.22410  | 0.60850  | 0.41410 |  |

|      |    |   |         |         |         |
|------|----|---|---------|---------|---------|
| C11B | 4e | 1 | 0.33130 | 0.78400 | 0.55940 |
| C14A | 4e | 1 | 0.06790 | 0.22790 | 0.48640 |
| C13D | 4e | 1 | 0.21720 | 0.42730 | 0.42740 |
| C14B | 4e | 1 | 0.43280 | 0.72680 | 0.48800 |
| C13B | 4e | 1 | 0.42570 | 0.74840 | 0.53670 |
| C13A | 4e | 1 | 0.07570 | 0.24600 | 0.53610 |
| C12D | 4e | 1 | 0.31680 | 0.47430 | 0.42540 |
| C12B | 4e | 1 | 0.53130 | 0.71980 | 0.55550 |
| O3B  | 4e | 1 | 0.34280 | 0.74630 | 0.46530 |
| C3B  | 4e | 1 | 0.35680 | 0.76540 | 0.75620 |

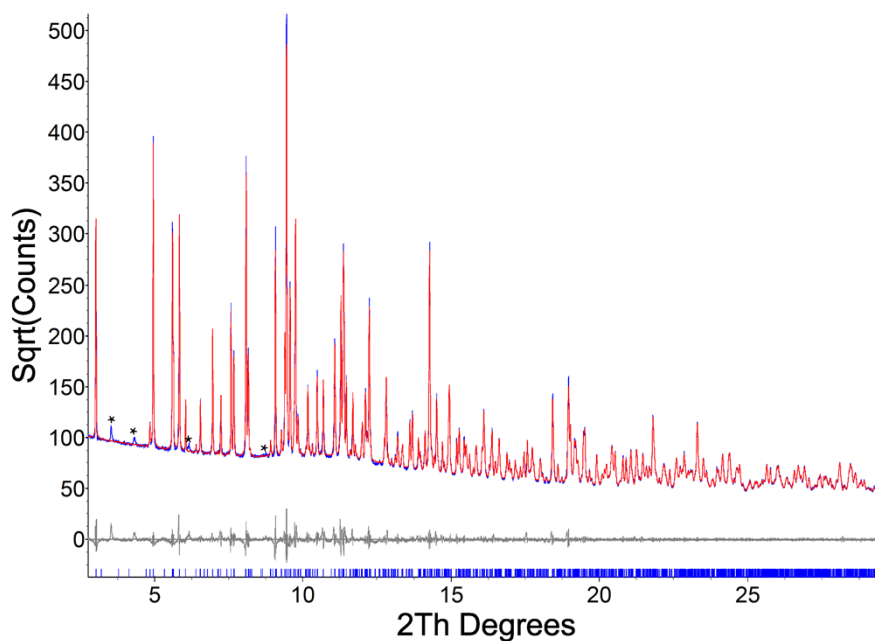

Plot S1: Experimental (blue), fitted (red), and difference (grey line below observed and calculated patterns) synchrotron PXRD profiles for the sample **2**. Small impurity peaks estimated <1 wt.% are marked as \*.

Synchrotron powder X-ray diffraction analysis reveals that the 2D interpenetrated sheets of the solvated structure **2** are stacked in A-B-A-B-A. Zn-O bond length are approximately 1.969(4) Å, and longer interaction between Zn and O can be 2.757(3) Å. Zn-N bond length ranges from 2.049(3) Å to 2.137(1) Å. The 2D network can mainly be stabilized by van der Waals interactions, evidenced by the typical step isotherms of CO<sub>2</sub>, CH<sub>4</sub> adsorption/desorption. It is well-known that van der Waals forces are responsible for the structural robustness of 2D MOFs among literature reports.<sup>5-7</sup>

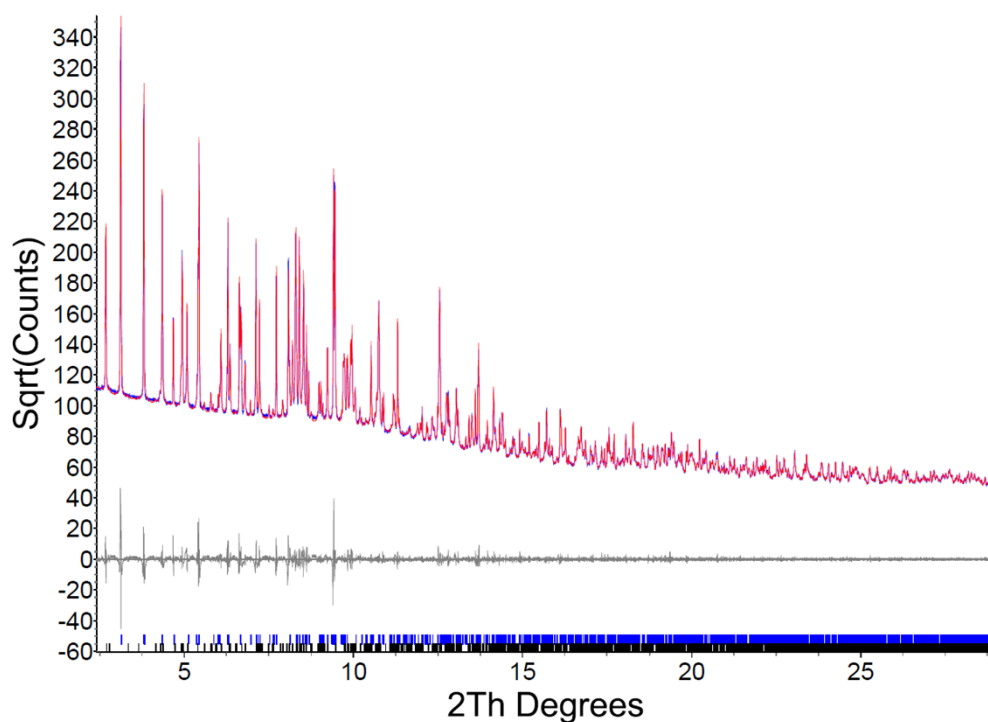

Plot S2: Synchrotron PXRD profiles for the 6 days exchange sample. The black tick line is daughter structure **2** phase, the blue tick line is parent structure **1** phase. Experimental (blue), fitted (red), and difference (grey line below observed and calculated patterns)

#### 4. Gas adsorption experiment

Adsorption properties were studied by volumetric apparatus ASAP 2010 and ASAP 2050 (Micromeritics, USA). High purity N<sub>2</sub> (99.999%), H<sub>2</sub> (99.999%), CO<sub>2</sub> (99.995%) and CH<sub>4</sub> (99.95%) were used. Around 200 mg of the as-synthesized samples were filtered and washed with DMF. The samples were dried at 60 °C in a vacuum oven. Then, the sample was heated up to 120 °C (1 °C /min) under high vacuum (below 10<sup>-2</sup> Pa) and holding at 120 °C for 12 h to obtain desolvated samples.

## 5. Experimental results

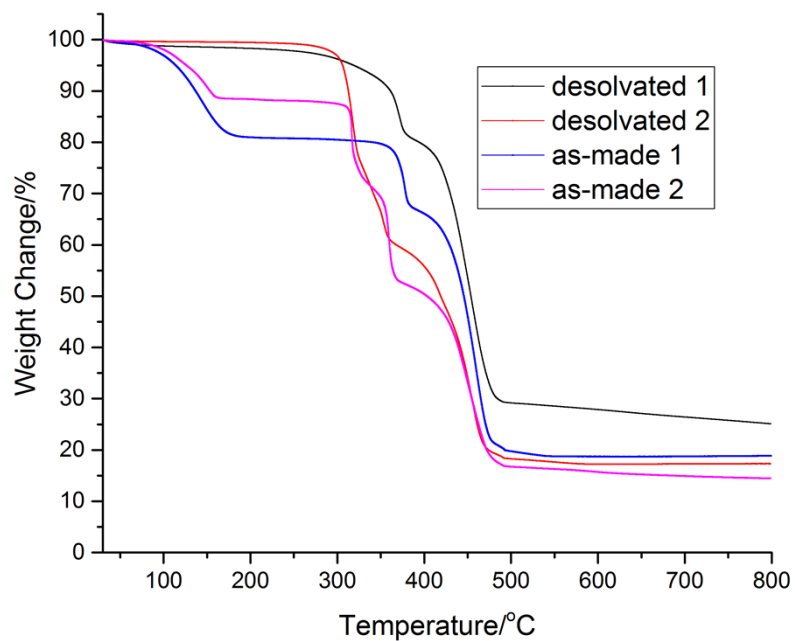

Fig. S2 TGA patterns of sample 1 and 2

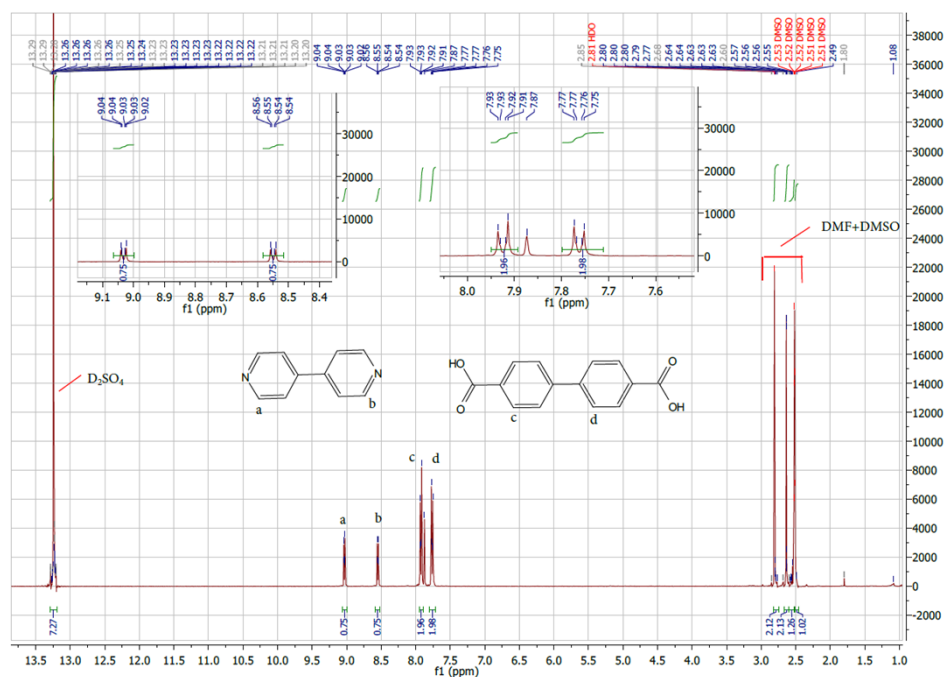

Fig. S3 <sup>1</sup>H NMR spectrum of parent sample 1





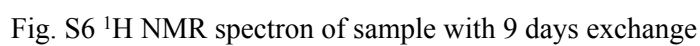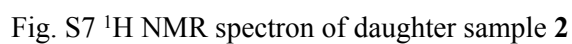

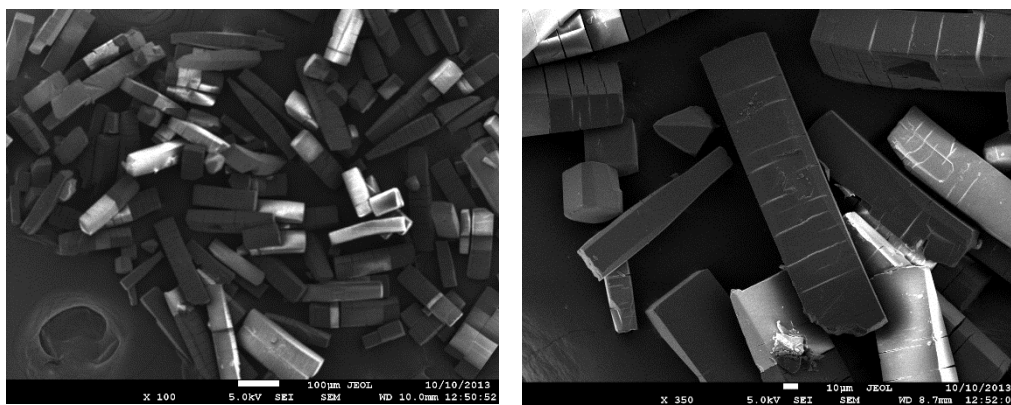

Fig. S8 SEM images of sample 1

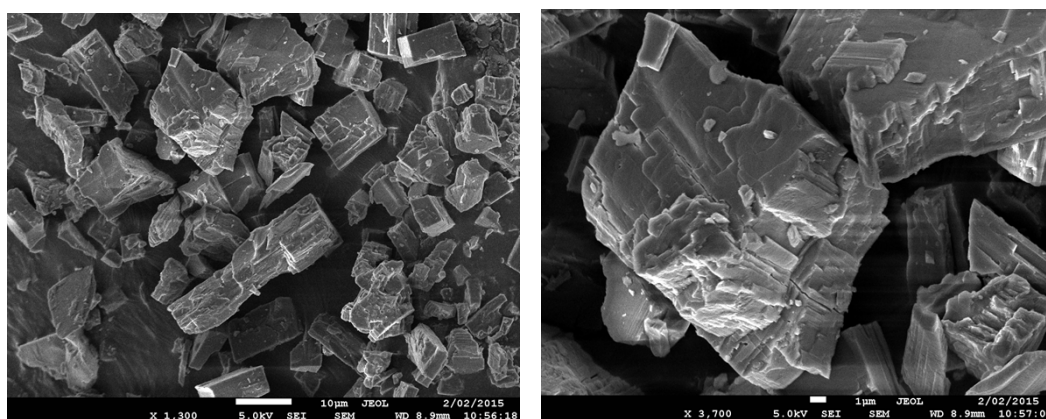

Fig. S9 SEM images of sample 2

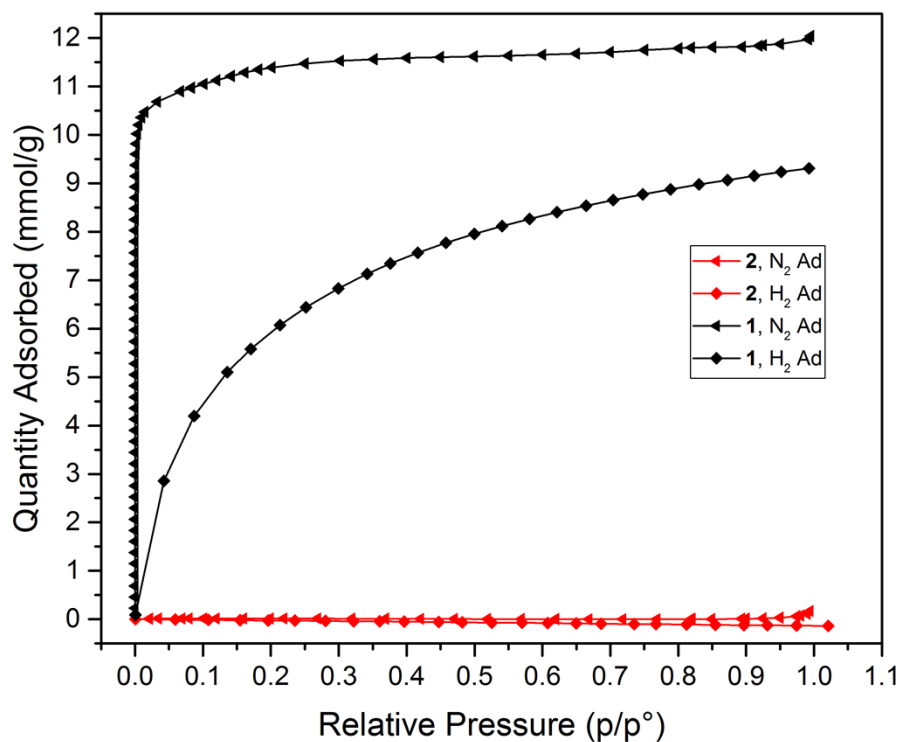

Fig. S10 N<sub>2</sub> and H<sub>2</sub> adsorption isotherms at 77 K of **1** (in black) and **2** (in red).

#### References

1. Q. Fang, X. Shi, G. Wu, G. Tian, G. Zhu, R. Wang and S. Qiu, *Journal of Solid State Chemistry*, 2003, **176**, 1-4.
2. A. Boulton and D. Louer, *Journal of Applied Crystallography*, 2004, **37**, 724-731.
3. B. AXS, Bruker AXS Karlsruhe, Germany, 2008.
4. V. Favre-Nicolin and R. Černý, *Zeitschrift für Kristallographie/International journal for structural, physical, and chemical aspects of crystalline materials*, 2004, **219**, 847-856.
5. A. Kondo, H. Kajiro, H. Noguchi, L. Carlucci, D. M. Proserpio, G. Ciani, K. Kato, M. Takata, H. Seki, M. Sakamoto, Y. Hattori, F. Okino, K. Maeda, T. Ohba, K. Kaneko and H. Kanoh, *J Am Chem Soc*, 2011, **133**, 10512-10522.
6. L. Carlucci, G. Ciani, D. M. Proserpio, T. G. Mitina and V. A. Blatov, *Chem Rev*, 2014, **114**, 7557-7580.
7. C. R. Murdock, B. C. Hughes, Z. Lu and D. M. Jenkins, *Coordination Chemistry Reviews*, 2014, **258-259**, 119-136.
